# Supplementary material for: Efficacy of a Third-Generation Oncolytic Herpes Virus G47Δ in Advanced Stage Models of Human Gastric Cancer
Source: PubMed Central journal article supplement — Mol Ther Oncolytics. 2020 Apr 8;17:205–15. doi: 10.1016/j.omto.2020.03.022 (PMC7178322; doi:10.1016/j.omto.2020.03.022), 2020-04-08
Supplement: mmc1.pdf [file mmc1.pdf]

OMTO, Volume 17

## **Supplemental Information**

**Efficacy of a Third-Generation Oncolytic**

**Herpes Virus G47 $\Delta$  in Advanced Stage**

**Models of Human Gastric Cancer**

**Kotaro Sugawara, Miwako Iwai, Shoh Yajima, Minoru Tanaka, Kazuyoshi  
Yanagihara, Yasuyuki Seto, and Tomoki Todo**

Figure S1

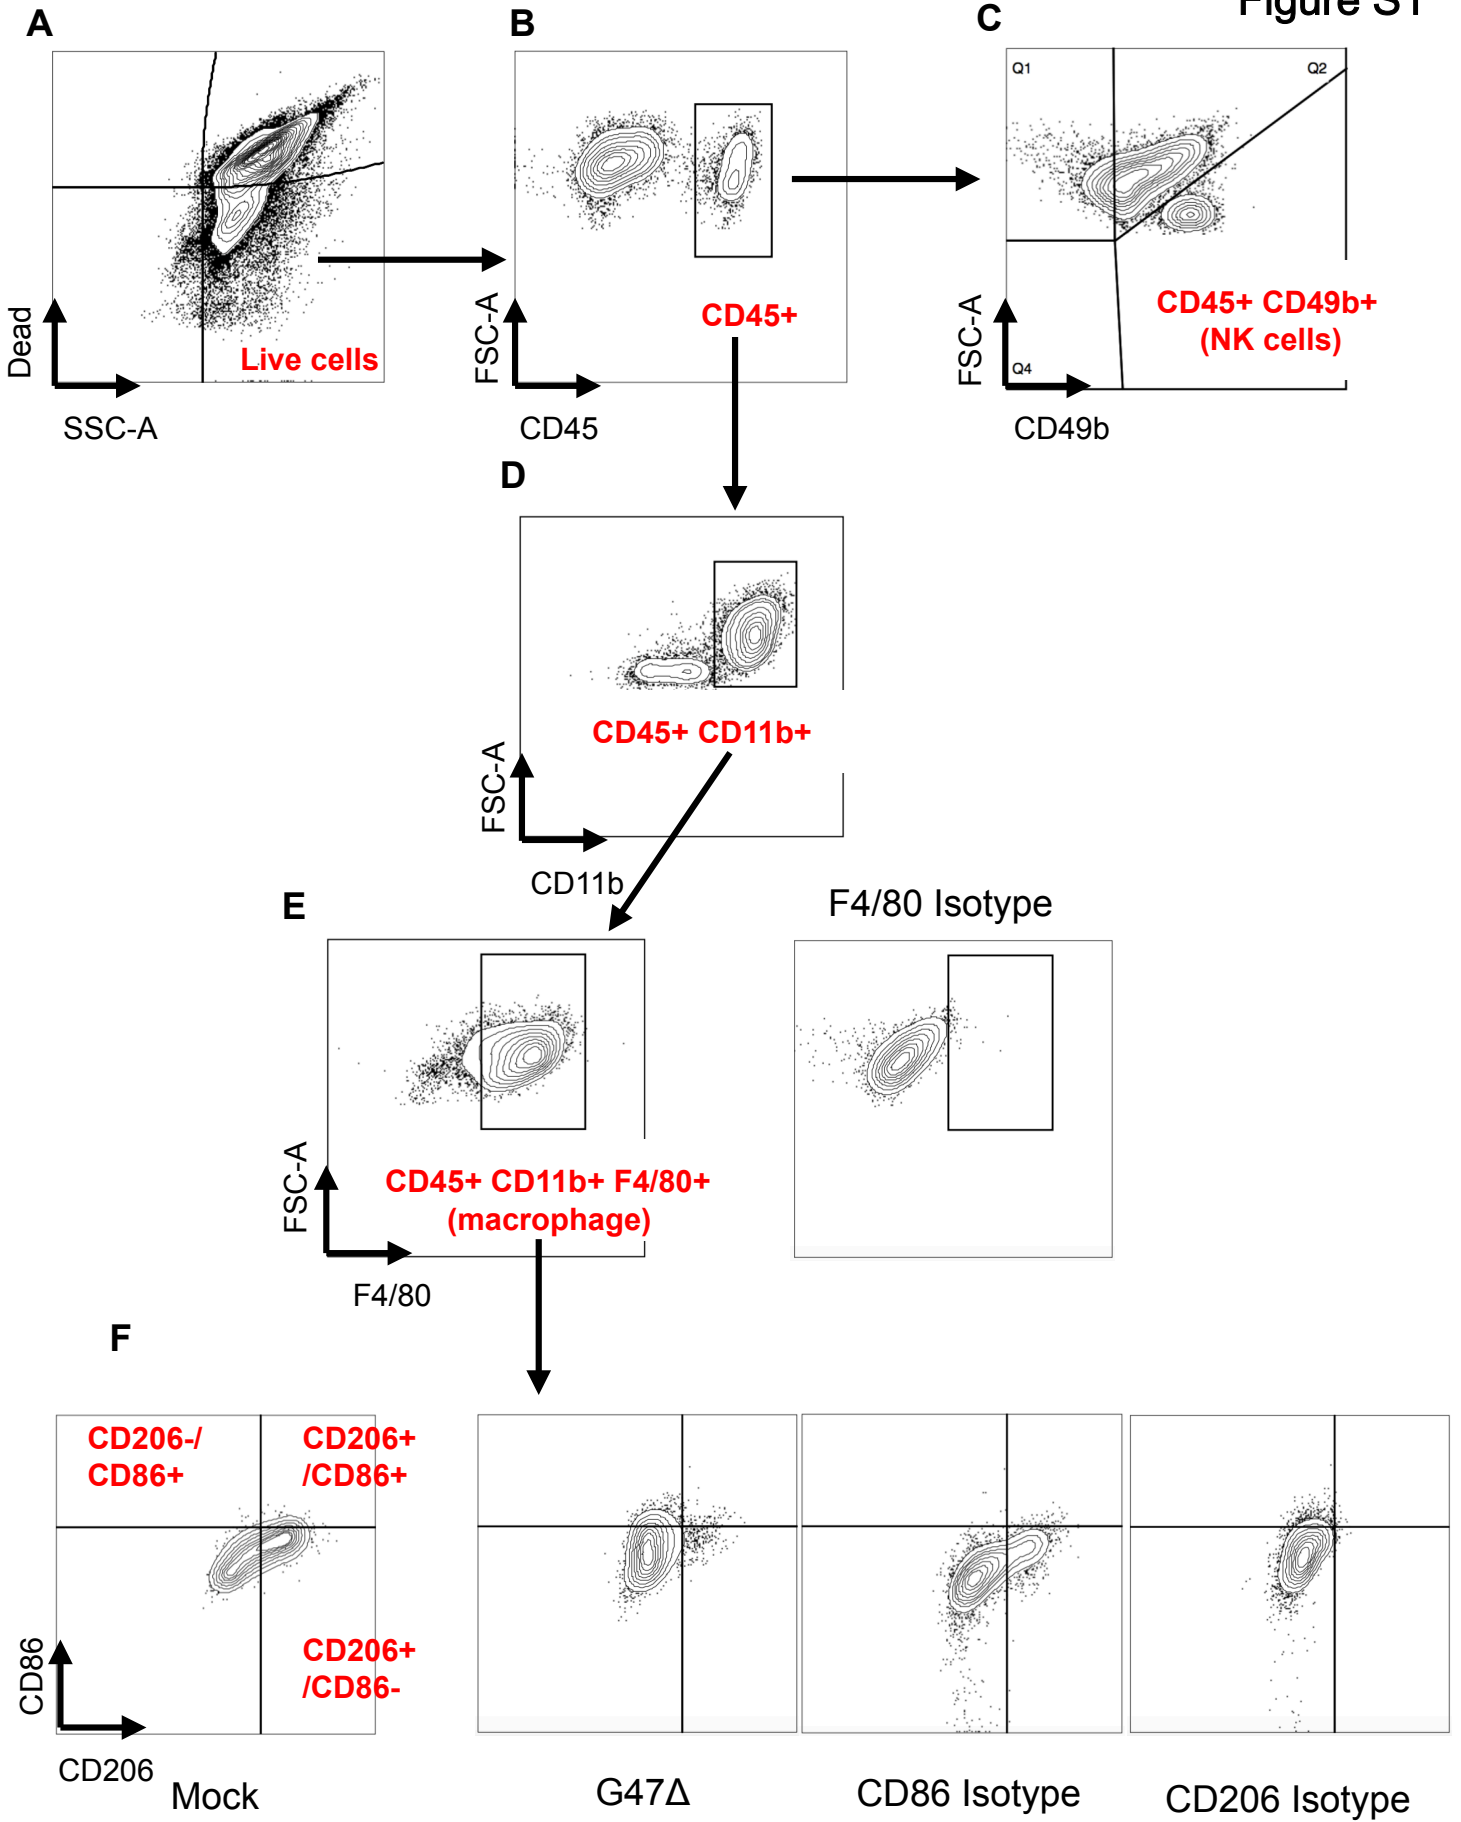

## **Supplemental Figure 1. Gating strategy**

Representative flow cytometry plots and the gating strategy are shown. (A, B, D, E) Macrophages were assessed as CD45<sup>+</sup>CD11b<sup>+</sup> F4/80<sup>+</sup> after dead cells and doublets were removed. (C) NK cells were defined as CD45<sup>+</sup>CD49b<sup>+</sup>. (F) M1 macrophages (CD86<sup>+</sup>CD206<sup>-</sup> macrophages) and M2 macrophages (CD86<sup>-</sup>CD206<sup>+</sup> macrophages) were determined based on the each isotype control.
